# Supplementary material for: Agonism of GPR120 prevented IL-1β-induced reduction of extracellular matrix through SOX-9
Source: Aging (Albany NY). 2020 Jun 24;12(12):12074–85. doi: 10.18632/aging.103375 (PMC7343462; doi:10.18632/aging.103375)
Supplement: Supplementary Figures [file aging-12-103375-s001..pdf]

## SUPPLEMENTARY FIGURES

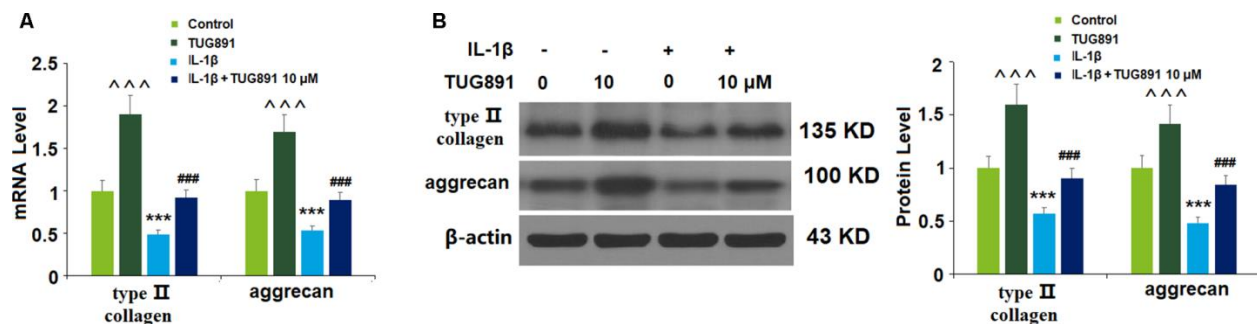

**Supplementary Figure 1. Treatment with TUG891 prevented IL-1 $\beta$ -induced reduction of type II collagen and aggrecan in ATDC5 chondrocytes.** Cells were treated with IL-1 $\beta$  (10 ng/ml) with or without TUG891 (10  $\mu$ M) for 24 h. (A) mRNA of type II collagen and aggrecan; (B) Protein of type II collagen and aggrecan (^^^, \*\*\*,  $P < 0.0001$  vs. control group; ###,  $P < 0.0001$  vs. IL-1 $\beta$  treatment group,  $n = 4-5$ ).

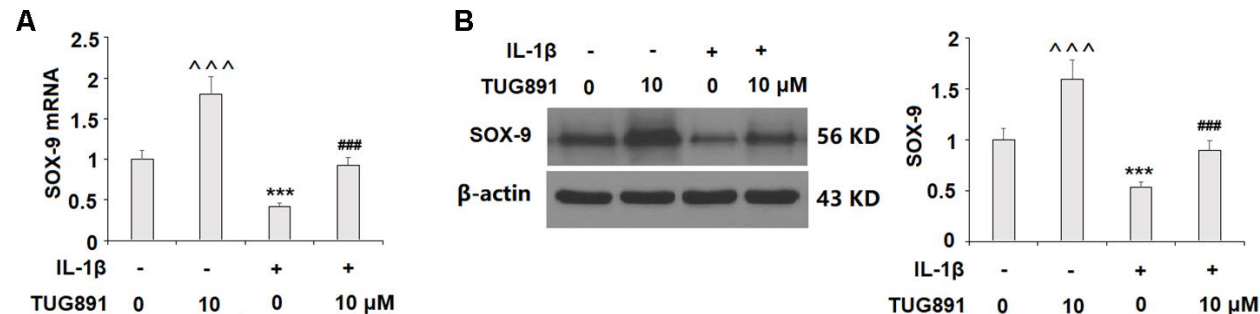

**Supplementary Figure 2. Treatment with TUG891 prevented IL-1 $\beta$ -induced reduction of SOX-9 in ATDC5 chondrocytes.** Cells were treated with IL-1 $\beta$  (10 ng/ml) with or without TUG891 (10  $\mu$ M) for 24 h. (A) mRNA of SOX-9; (B) Protein of SOX-9 (^^^, \*\*\*,  $P < 0.0001$  vs. control group; ###,  $P < 0.0001$  vs. IL-1 $\beta$  treatment group,  $n = 4-5$ ).

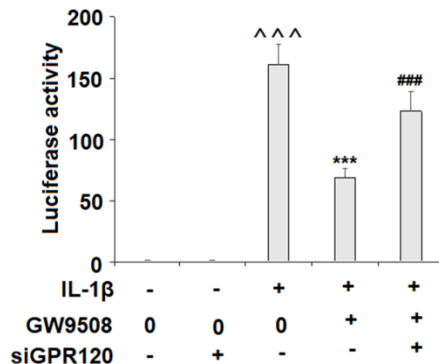

**Supplementary Figure 3. GW9508 suppressed the activation of NF- $\kappa$ B.** ATDC5 chondrocytes were transfected with GPR120 siRNA for 24 h, followed by stimulation with IL-1 $\beta$  (10 ng/ml) with or without GW9508 (50  $\mu$ M) for 24 h. (A) Levels of nuclear NF- $\kappa$ B p65 were measured; (B) Luciferase activity of NF- $\kappa$ B promoter was measured (^^^,  $P < 0.0001$  vs. control group; \*\*\*,  $P < 0.0001$  vs. IL-1 $\beta$  treatment group; ###,  $P < 0.0001$  vs. IL-1 $\beta$  + GW9508 treatment,  $n = 4-5$ ).
